# Supplementary material for: Polymorphism in anti-hyperammonemic agent N-carbamoyl-l-glutamic acid
Source: Royal Society of Chemistry journal article supplement (doi:10.1039/c5ce00116a), 2015-01-01
Supplement: c5ce00116a1.pdf [file c5ce00116a1.pdf]

## Electronic Supplementary Information (ESI†)

### Polymorphism in anti-hyperammonemic agent N-carbamoyl-L-glutamic acid†

D. Maddileti, and Ashwini Nangia\*

School of Chemistry, University of Hyderabad, Prof. C. R. Rao Road, Gachibowli, Central University  
PO, Hyderabad 500 046, India.

E-mail: [ashwini.nangia@gmail.com](mailto:ashwini.nangia@gmail.com)

**Table S1** Shows that difference in the torsion angle in both the forms (Form-I and Form-II).

| Torsion angles ( $\tau$ ) | CGA-Form-I | CGA-Form-II<br>molecule A/molecule B |
|---------------------------|------------|--------------------------------------|
| C2-C3-C4-C5 ( $\tau_1$ )  | 79.72°     | 177.35°/ 178.73°                     |
| C6-N1-C2-C1 ( $\tau_2$ )  | 81.26°     | -55.77°/ -57.59°                     |
| N1-C2-C3-C4 ( $\tau_3$ )  | 176.89°    | -175.87°/ -168.49°                   |

**Table S2** Summary of FT-IR stretching frequencies of CGA polymorphs.

| Drug forms  | 1° and 2°<br>N-H stretch<br>(cm <sup>-1</sup> ) | C-H Stretch<br>(cm <sup>-1</sup> ) | Carboxylic<br>C=O stretch<br>(cm <sup>-1</sup> ) | Amide C=O<br>stretch (cm <sup>-1</sup> ) | O-H stretch<br>(cm <sup>-1</sup> ) |
|-------------|-------------------------------------------------|------------------------------------|--------------------------------------------------|------------------------------------------|------------------------------------|
| CGA-Form-I  | 3439.9<br>3344.3<br>3295.4                      | 2952.1                             | 1728.5                                           | 1697.3                                   | 3169.2                             |
| CGA-Form-II | 3454.3<br>3315.3<br>3247.3                      | 2957.7                             | 1709.9                                           | 1666.9                                   | 3112.5                             |

**Table S3** <sup>13</sup>C ss-NMR chemical shift values ( $\delta$ , ppm) of CGA Polymorphs

| Carbon No. | CGA-Form-I | CGA-Form-II    |
|------------|------------|----------------|
| C1         | 175.43     | 175.36, 177.33 |
| C2         | 55.85      | 55.83          |

|    |        |                |
|----|--------|----------------|
| C3 | 25.62  | 25.56          |
| C4 | 30.35  | 30.31          |
| C5 | 179.47 | 179.44, 181.67 |
| C6 | 160.19 | 160.18         |

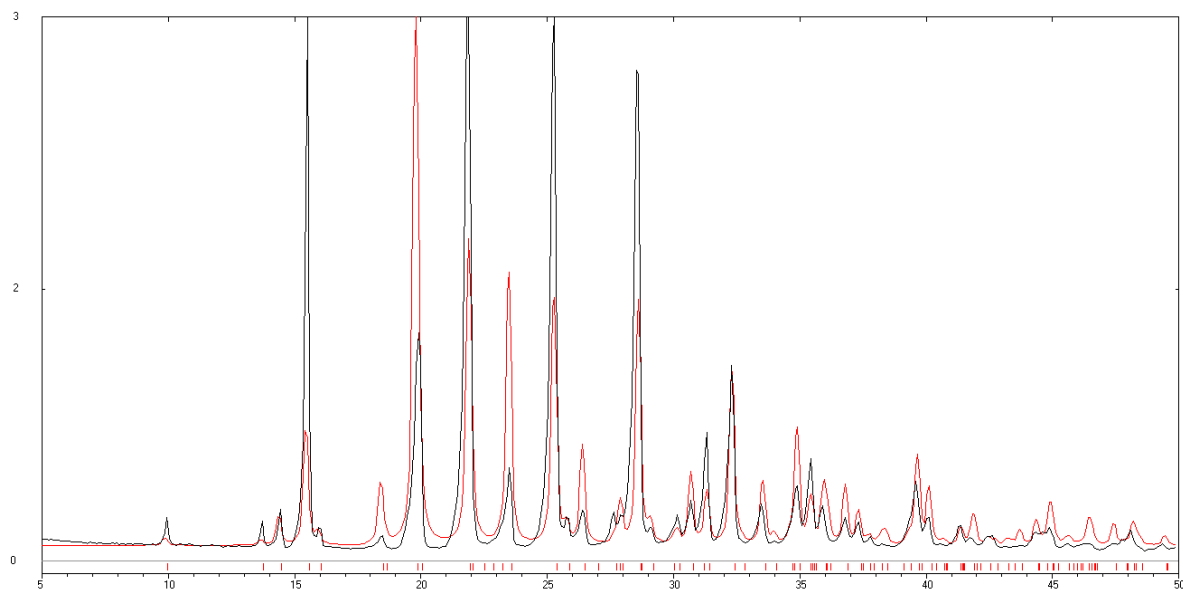

**Figure S1** Overlay of experimental PXRD pattern (black) of CGA-Form-I matches with the calculated powder lines from the crystal structure (red).

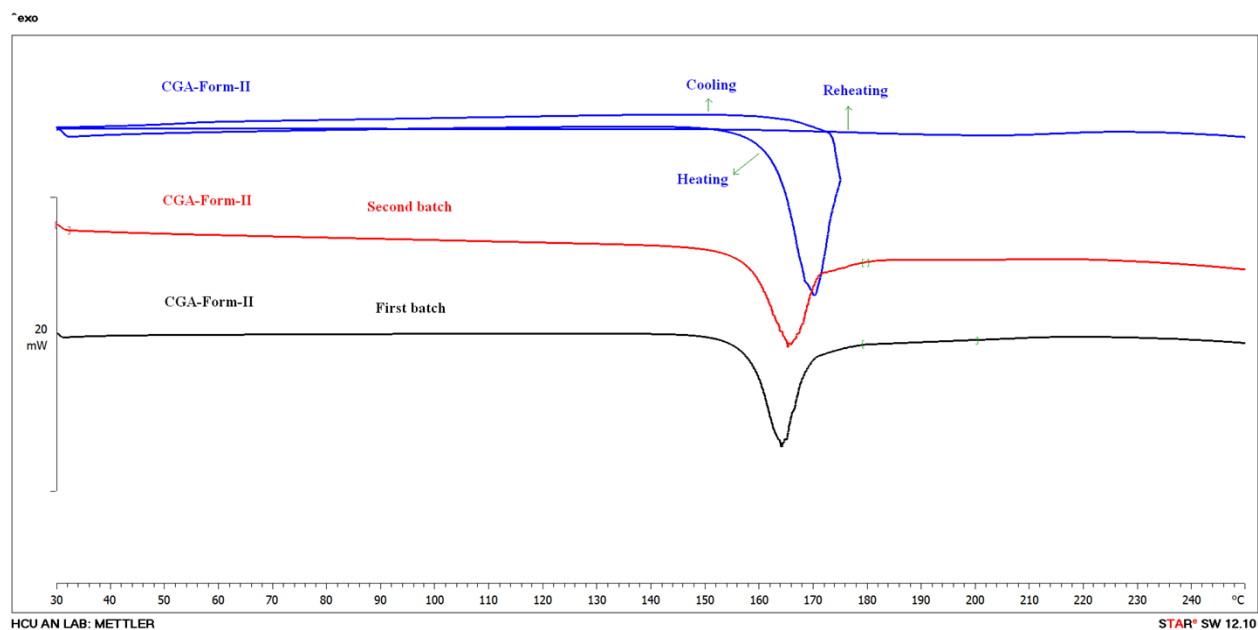

(a)

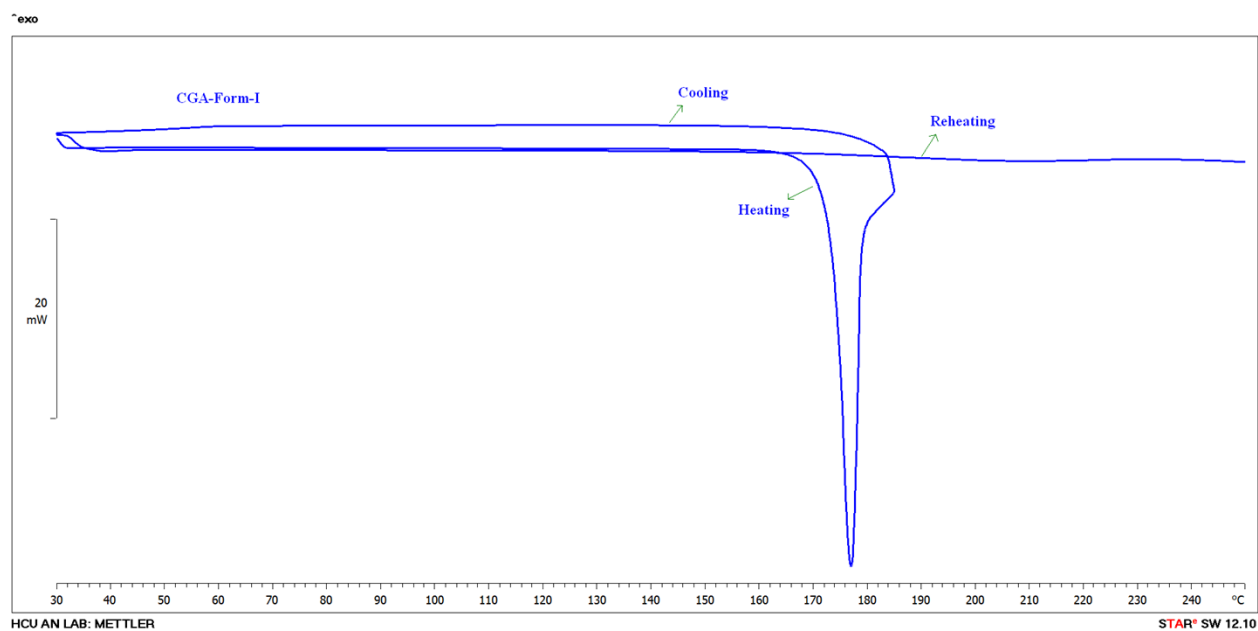

(b)

**Figure S2** (a) The broad peak for endotherm of Form-II is reproducible. A heat-cool-heat experiment on Form-II (a) as well as Form-I (b) showed no phase transition events at the melting temperature suggesting some kind of decomposition of CGA takes place upon heating to the melting temperature.

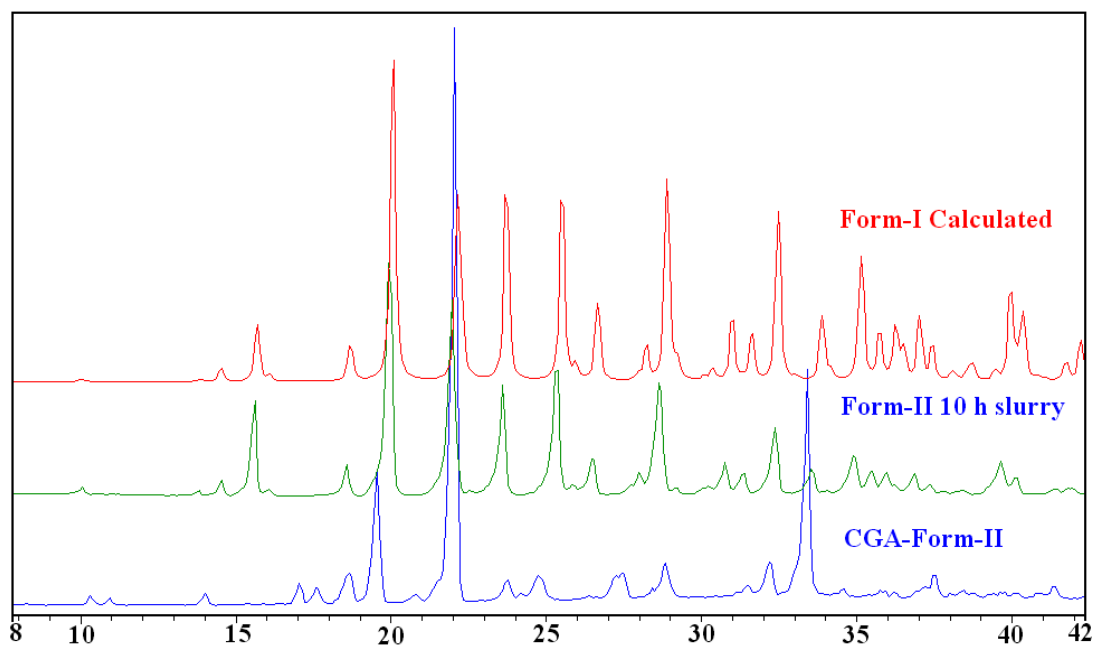

**Figure S3** Overlay of experimental PXRD pattern of CGA-Form-II (blue) with the PXRD pattern after slurry experiment in which Form-II was found to convert into Form-I after 10 h slurry in EtOH. The calculated pattern of Form-I is shown for comparison (red).

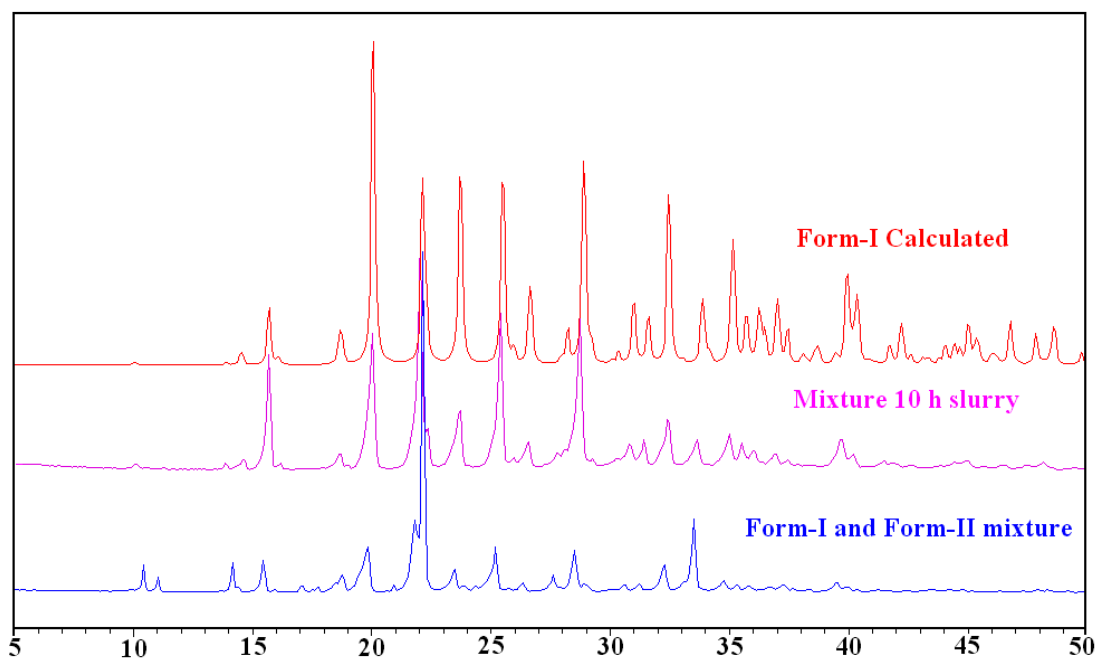

**Figure S4** The mixture of Form-I and II (blue) was found to convert into Form-I (magenta) after slurry in pentane solvent. The calculated PXRD pattern of Form-I (red) was shown for comparison.
